# Supplementary material for: p53-dependent chemokine production by senescent tumor cells supports NKG2D-dependent tumor elimination by natural killer cells
Source: PubMed Central journal article supplement — J Exp Med. 2013 Sep 23;210(10):2057–69. doi: 10.1084/jem.20130783 (PMC3782044; doi:10.1084/jem.20130783), 2013-09-23
Supplement: supp_jem.20130783_JEM_20130783_sm.pdf [file supp_jem.20130783_JEM_20130783_sm.pdf]

## SUPPLEMENTAL MATERIAL

Iannello et al., <http://www.jem.org/cgi/content/full/jem.20130783/DC1>**Table S1.** List of forward and reverse primers used in Q-RT-PCR and the amplicon size for each target

| Target        | Forward (F) and reverse (R) primers (5'-3')            | Amplicon size |
|---------------|--------------------------------------------------------|---------------|
| <i>Il1b</i>   | F: CAACCAACAAGTGATATTCTCCATG; R: GATCCACACTCTCCAGCTGCA | 152 bp        |
| <i>Il6</i>    | F: CTGCAAGAGACTTCCATCCAGTT; R: GAAGTAGGGAAGGCCGTGG     | 70 bp         |
| <i>Il12b</i>  | F: GGAAGCACGGCAGCAGAATA; R: AACTTGAGGGAGAAGTAGGAATGG   | 180 bp        |
| <i>Il15</i>   | F: CGTGCTCTACCTTGCAAACA; R: TCTCCTCCAGCTCCTCACAT       | 86 bp         |
| <i>Il18</i>   | F: CAGGCCTGACATCTTCTGCAA; R: TCTGACATGGCAGCCATTGT      | 105 bp        |
| <i>Ccl2</i>   | F: GTGGGGCGTTAACTGCAT; R: CAGGTCCCTGTCATGTTCT          | 91 bp         |
| <i>Ccl3</i>   | F: GTACCATGACACTCTGCAACCAA; R: GTAGGAGAAGCAGCAGGCAGTC  | 77 bp         |
| <i>Ccl4</i>   | F: TTACTATGAGACCAGCAGTC; R: GTTCAACTCCAAGTCACTC        | 127 bp        |
| <i>Ccl5</i>   | F: TCTACACCAGCAGCAAGT; R: TCTTGAACCCACTTCTTCTC         | 97 bp         |
| <i>Cxcl1</i>  | F: TGTTGTGCGAAAAGAAGTGC; R: TACAAACACAGCCTCCACA        | 91 bp         |
| <i>Cxcl2</i>  | F: TCAAGGGCGTCAAAAAGTT; R: TCCTCCTTTCCAGGTCAGTTA       | 101 bp        |
| <i>Raet1d</i> | F: CAACTTGACCATCAAGGCTCCTA; R: GATAAGTATTTACCCACGAAGCA | 67 bp         |
| <i>Raet1e</i> | F: CAGGTGACCCAGGGAAGATG; R: CTCAACTCCTGGCACAATCG       | 79 bp         |
| <i>Ulp1</i>   | F: CAATGTCTGTCTCCTCGGAA; R: CTGAACACGTCTCAGGCACT       | 112 bp        |
| <i>H60a</i>   | F: GAGCCACCAGCAAGAGCAA; R: CCAGTATGGTCCCCAGATAGCT      | 75 bp         |
| <i>Rn18s</i>  | F: GTCTGTGATGCCCTTAGATG; R: AGCTTATGACCCGCACTTAC       | 177 bp        |
